# Supplementary material for: Streamlining the biodesulfurization process: development of an integrated continuous system prototype using Gordonia alkanivorans strain 1B
Source: Royal Society of Chemistry journal article supplement (doi:10.1039/d3ra07405f), 2024-01-01
Supplement: d3ra07405f1.pdf [file d3ra07405f1.pdf]

### SUPPLEMENTARY DATA

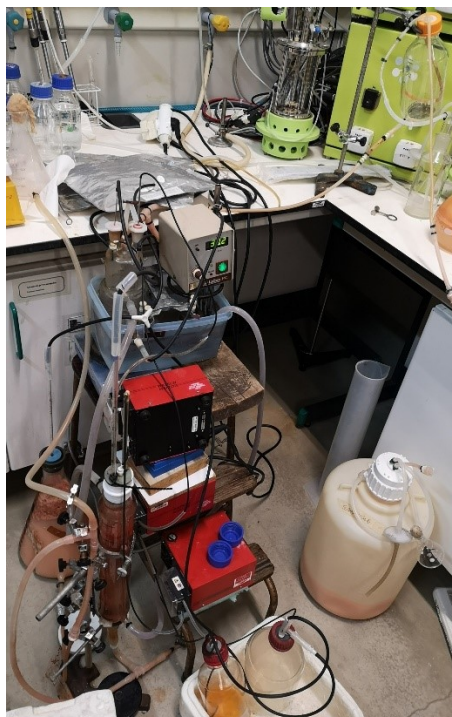

**Fig. S1.** Photo of the continuous biodesulfurization system prototype focusing on steps II and III.

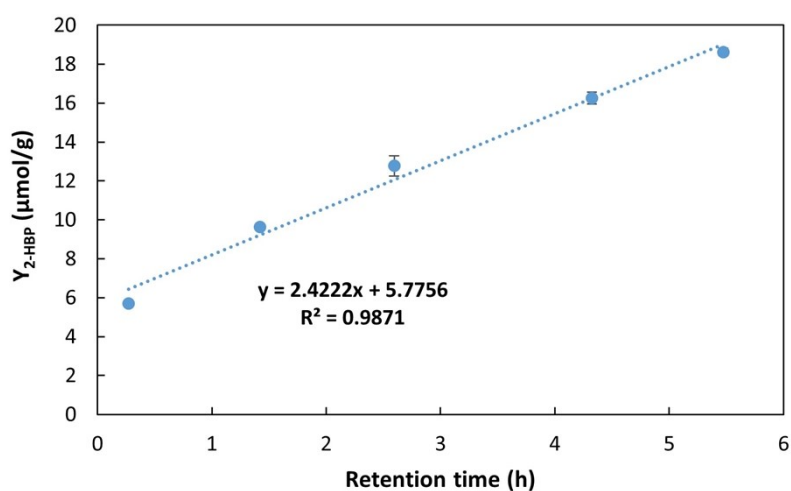

**Fig. S2.** Correlation between  $Y_{2-HBP}$  and retention time, when different volumes were tested on the BDS continuous system, with 35% n-heptane containing 500  $\mu\text{M}$  of DBT (3.5:6.5 ratio).
